# Supplementary material for: Pneumococcal vaccination decreases atherosclerotic lesion formation: molecular mimicry between Streptococcus pneumoniae and oxidized LDL
Source: Springer Nature journal article supplement (doi:10.1038/nm876), 2003-05-12
Supplement: nm876-S1.pdf [file nm876-S1.pdf]

### Supplementary Figure 1.

Related to Figure 1 in the manuscript.

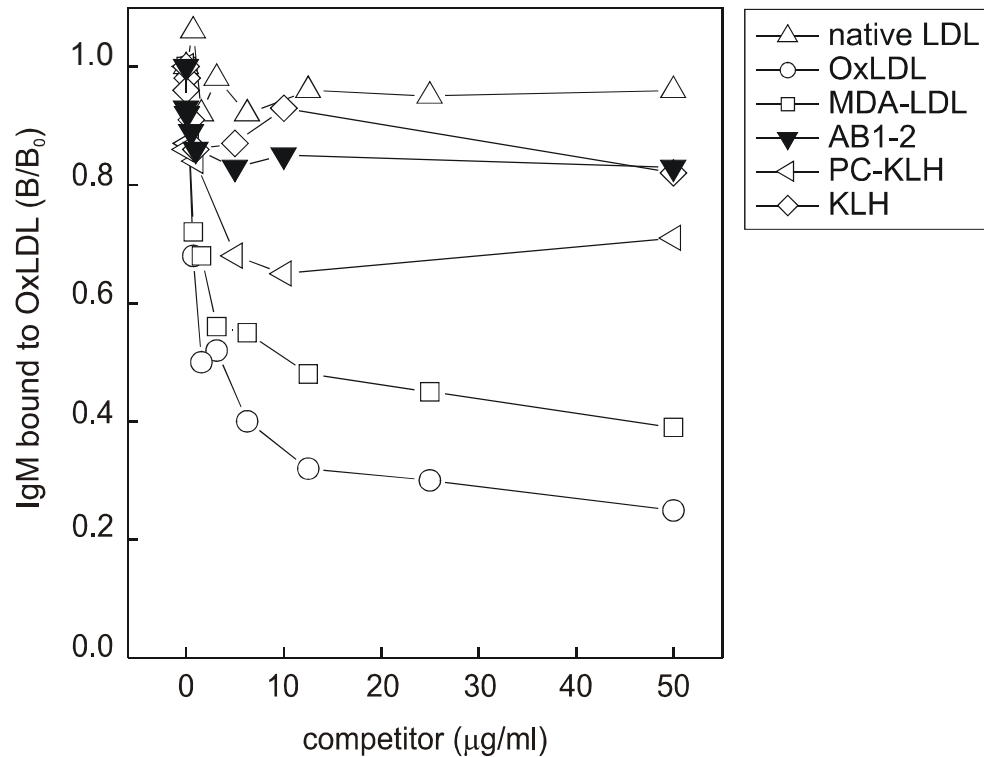

**Anti-OxLDL IgM antibodies induced by immunization with PBS in CFA/IFA display different binding specificities.** Competition immunoassay of pooled sera for binding of plasma IgM to OxLDL with increasing concentrations of native LDL, OxLDL, MDA-LDL, T15-clonospesific antibody AB1-2, PC-KLH, or KLH. Data are expressed as a ratio of binding in the presence of competitor (B) divided by binding in the absence of competitor (B<sub>0</sub>). These data demonstrate that the low-titered IgM anti-OxLDL antibodies induced by Freund's adjuvant are not T15 clonotypic. Data represent means of triplicate determinations.
